# Supplementary material
Source: MDPI journal article supplement (https://www.mdpi.com/2073-4395/13/3/912)
Supplement: s1 [file s1]

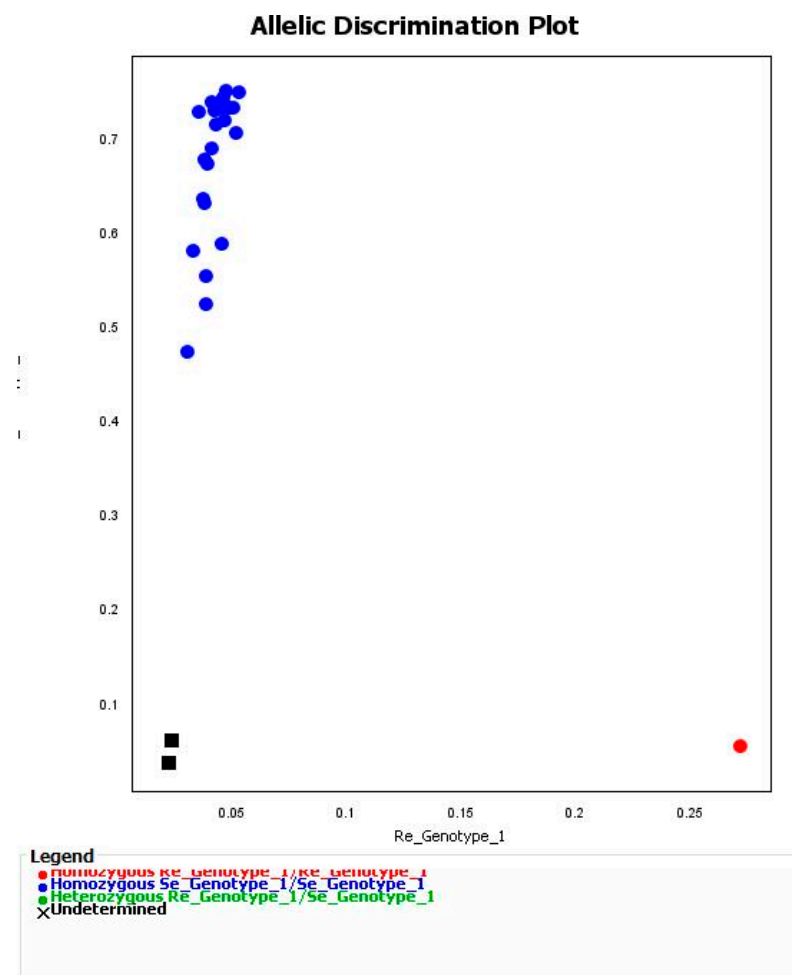

**Figure S1.** Example of allele discrimination plot of polymorphic SNP marker (KJ11\_13, Table S6).

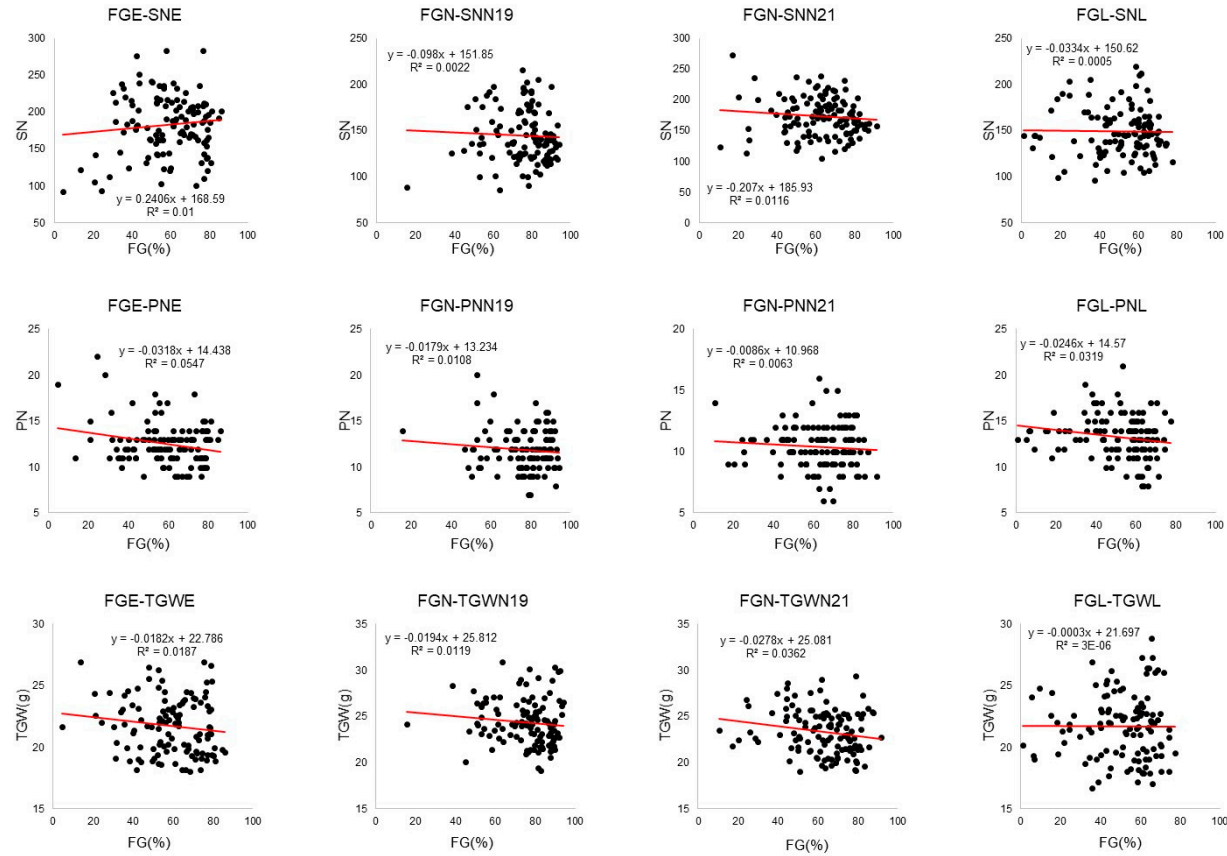

FGE, SNE, PNE, TGWE: early cultivation season  
 FGN19, SNN19, PNN19, TGWN19: normal cultivation season (2019)  
 FGN21, SNN21, PNN21, TGWN21: normal cultivation season (2021)  
 FGL, SNL, PNL, TGWL: late cultivation season

**Figure S2.** Correlation between grain properties and yield component with normal fertilization level (y: FG, x: SN or PN or TGW, SN: spikelet number per panicle, PN: panicle number per plant, TGW: thousand-grain weight (g), FG: percentage of filled grain (%), E: early season, N: normal season, L: late season,  $R^2$ : coefficient of determination).

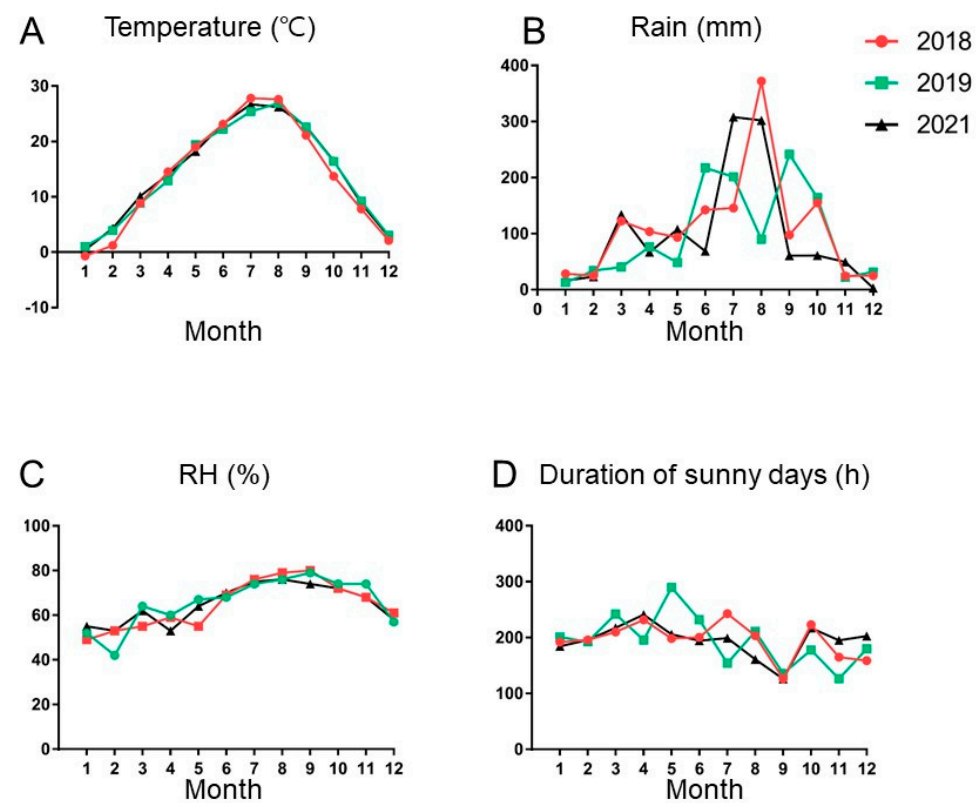

**Figure S3.** Weather conditions prevailing during 2018, 2019, and 2021 cultivation seasons.

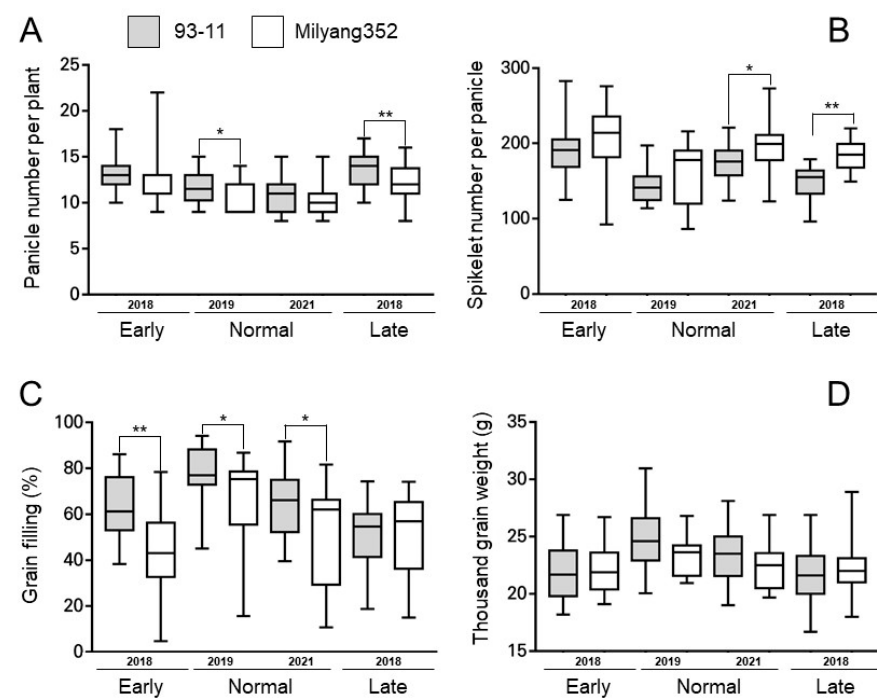

**Figure S4.** The distribution of grain properties of the two groups differed by the genotype of *qFG3* in different fertilization levels and cropping seasons.

**Table S1.** cM of each chromosome.

| <b>Chr.</b> | <b>Number of Markers</b> | <b>Number of Deviated Markers</b> | <b>Length (cM)</b> | <b>Average Gap of Markers (cM)</b> |
|-------------|--------------------------|-----------------------------------|--------------------|------------------------------------|
| 1           | 29                       | 4                                 | 310.8              | 10.7                               |
| 2           | 16                       | 7                                 | 323.6              | 20.2                               |
| 3           | 19                       | 11                                | 233.5              | 12.3                               |
| 4           | 18                       | 6                                 | 192.9              | 10.7                               |
| 5           | 15                       | 11                                | 150.9              | 10.1                               |
| 6           | 11                       | 0                                 | 60.5               | 5.5                                |
| 7           | 26                       | 8                                 | 231.7              | 8.9                                |
| 8           | 16                       | 7                                 | 109.5              | 6.8                                |
| 9           | 18                       | 2                                 | 109.3              | 6.1                                |
| 10          | 13                       | 4                                 | 130.9              | 10.1                               |
| 11          | 16                       | 0                                 | 131.9              | 8.2                                |
| 12          | 12                       | 9                                 | 131.1              | 10.9                               |
| Total       | 209                      | 69                                | 2116.6             | 10.1                               |

**Table S2.** List of SNP markers

| Chr. | Position (bp) | Marker name | Source | Allele specific primer 1            | Allele specific primer 2           | Common reverse primer                   |
|------|---------------|-------------|--------|-------------------------------------|------------------------------------|-----------------------------------------|
| 1    | 422,620       | id1000223   | [30]   | GACATTTGCAAGCAACTT<br>ATACTGACA     | ACATTTGCAAGCAACTT<br>ATACTGACC     | TGCTTCAGAGATGGC<br>CTCGAA               |
| 1    | 728,809       | KJ01_001    | [29]   | CAGCCTCACCTCATATCC<br>ACCAT         | AGCCTCACCTCATATCC<br>ACCAC         | CCTGATCAGTTGGAC<br>GAGGTAAACAA          |
| 1    | 2,103,204     | KJ01_005    | [29]   | AAGAGAATAAGTTCCTAC<br>TCCGTTCAT     | GAGAATAAGTTCCTACT<br>CCGTTCAG      | TGACAAGTTTGACAC<br>CGGGGAGAAA           |
| 1    | 14,573,814    | id1009557   | [30]   | GTGCTCATCTTTAGATTG<br>ATTTGTCCAT    | GTGCTCATCTTTAGATT<br>GATTTGTCCAG   | GATGGCACTTCACATT<br>GGCCT               |
| 1    | 19,264,312    | id1010652   | [30]   | TCTCAATTTAACAACAGC<br>ATCTGAAGC     | GATCTCAATTTAACAAC<br>AGCATCTGAAGA  | CCGTTGCTTTGTTGGT<br>CGGA                |
| 1    | 19,985,793    | KJ01_065    | [29]   | GAAGAAAGAGAGCTCTA<br>CCGCTC         | AGAAGAAAGAGAGCTC<br>TACCGCTT       | GCACCCAAAAGGTCA<br>TCTTCTTCCTT          |
| 1    | 22,048,209    | KJ01_073    | [29]   | ATCTTGTTAAATCAAAGA<br>TGTTGTAGCA    | ATCTTGTTAAATCAAAG<br>ATGTTGTAGCC   | CCCATTTGTATGTGGT<br>TAGCCTTCTATTT       |
| 1    | 22,138,518    | ah01001478  | [30]   | CGATGCCAATACTAGCCA<br>ATGTCA        | GATGCCAATACTAGCCA<br>ATGTCTG       | TGGACATATAACCGA<br>TTGCTCAAAACCT        |
| 1    | 23,434,283    | KJ01_075    | [29]   | AGGGGCTTTGTTGGTGGT<br>CAAAT         | GGGGCTTTGTTGGTGGT<br>CAAAC         | GCAGGGATTCGAGCA<br>TAATATAATCAGAT       |
| 1    | 24,007,114    | SaF-CT      | [30]   | CGGTGTCCAGGTAACCG<br>G              | CGGTGTCCAGGTAACCG<br>A             | GGTCACAATCAGCCG<br>TGCC                 |
| 1    | 24,199,706    | id1012784   | [30]   | AATAGCATCTAAAAACAT<br>GTTTTACACCGAA | AGCATCTAAAAACATGT<br>TTTACACCGAG   | CGGAGGGATGAAAAT<br>TTAATTTTCTCTCCA<br>A |
| 1    | 24,366,725    | KJ01_079    | [29]   | TGTCATTTCGATGTACGGA<br>TTGATAAA     | GTCATTTCGATGTACGGA<br>TTGATAAC     | GCTATGTATCAACTAA<br>CCAGTGTTCTGTTT      |
| 1    | 24,958,106    | KJ01_081    | [29]   | TAGTAGAAAAACAATGAT<br>AATCGAATGC    | CTTAGTAGAAAAACAAT<br>GATAATCGAATGG | CCGGTTTAAATAGAG<br>AGTTACGTCGATA        |
| 1    | 26,813,843    | ah01001843  | [30]   | TTGATGCTAAAAACGCCA<br>GTGAC         | GTTGATGCTAAAAACGC<br>CAGTGAT       | TGTGGGTAGGCATCA<br>TAAAAAGGAACT         |
| 1    | 27,013,911    | Rd-GA       | [30]   | TCCACGGTGGGCTTGAC                   | TTCCACGGTGGGCTTGA<br>T             | ACGCCCATGGACTTC<br>GAGT                 |

|   |            |            |      |                                |                                |                                                |
|---|------------|------------|------|--------------------------------|--------------------------------|------------------------------------------------|
| 1 | 29,381,536 | id1015984  | [30] | CAGGCTGGACATTTTGAC<br>TGAC     | TCAGGCTGGACATTTTG<br>ACTGAT    | GTCAAGAATCTCTGTA<br>AGAAATAGACAATAT<br>GTCAGTA |
| 1 | 32,551,664 | KJ01_093   | [29] | GTAACATGCTAGTAGCAT<br>CACCATGA | AACATGCTAGTAGCATC<br>ACCATGG   | GAGAGATGGGTGTCTG<br>GCGGAT                     |
| 1 | 33,063,515 | id1018870  | [30] | CGCTAGTGTAGAGCACG<br>AACATG    | CGCTAGTGTAGAGCAC<br>GAACATC    | GGACCACGGTGAGCC<br>AGA                         |
| 1 | 33,340,511 | KJ01_097   | [29] | CAAACGGTTTCTCCACCA<br>GTGG     | ACAAACGGTTTCTCCAC<br>CAGTGA    | CGTCTTTGATCCGCGC<br>AAAACCTCTA                 |
| 1 | 34,978,783 | ad01015967 | [30] | AGGTGCTTCTGATGTTAG<br>CTACG    | CAGGTGCTTCTGATGTT<br>AGCTACT   | CCAGGCTGTTTAGGA<br>GTTGGC                      |
| 1 | 37,298,045 | id1022407  | [30] | AGGGACAGATGCTGCTTT<br>GTTAA    | GGGACAGATGCTGCTTT<br>GTTAG     | CCGCAACAGTAACCA<br>GCACAA                      |
| 1 | 38,191,474 | qSH1-TG    | [30] | GCATTTGGTGGTACGTGT<br>ATCATGA  | CATTTGGTGGTACGTGT<br>ATCATGC   | AGGGTTCGGCGATGA<br>TGGT                        |
| 1 | 40,437,865 | KJ01_119   | [29] | ATTGGAACCATACTATCA<br>TCGTCAT  | ATTGGAACCATACTATC<br>ATCGTCAC  | GAGAAGAAAAGAAAA<br>GGGTCTTGACAGAA              |
| 1 | 40,892,591 | id1024836  | [30] | GCTTCAGGATTTTCAGTAG<br>GATCCAC | GCTTCAGGATTTTCAGTA<br>GGATCCAG | CCCGCTGAAGAACGT<br>GCTG                        |
| 1 | 41,138,835 | KJ01_121   | [29] | AAGGAAGGCCCGGCCCA<br>TC        | GAAAGGAAGGCCCGGC<br>CCATT      | TTAGTCCCTGCCGTTT<br>TGAGGCAA                   |
| 1 | 41,979,600 | KJ01_125   | [29] | GAGTACTACTTTGGCCGA<br>GTTCAA   | AGTACTACTTTGGCCGA<br>GTTCAG    | CACCATGTGTAGAAA<br>AGTTTTGATGTGATA             |
| 1 | 42,482,913 | KJ01_127   | [29] | TCTCTCCTTCGCTCGCTCT            | CTTCTCTCCTTCGCTCGC<br>TCC      | TCGTTTCGTTGTTAGTA<br>GGGTTTAGAGTTT             |
| 1 | 42,494,829 | P1193      | [30] | GCATTTTCGAGACCAGAC<br>CAGG     | GCATTTTCGAGACCAGA<br>CCAGT     | GCCTAGGGGGCCTGA<br>AAGTA                       |
| 1 | 42,946,801 | KJ01_129   | [29] | AGTAGCAGCAGCAGCTTA<br>GGTC     | AAGTAGCAGCAGCAGC<br>TTAGGTT    | CTCTTGATCGCACCA<br>TCCATATGAT                  |
| 1 | 43,613,762 | ad01020824 | [30] | GGGCCAAGGAGTACACC<br>A         | GGGCCAAGGAGTACAC<br>CT         | TCTGCTCGGCAGGCA<br>CT                          |
| 1 | 44,672,306 | id1028304  | [30] | GTTGATGGTCCTTGCTAA<br>AAGTGG   | AGTTGATGGTCCTTGCT<br>AAAAGTGA  | ATCATCACCTTCAGAT<br>TTCAAACAAAAAGAC<br>A       |
| 2 | 9,619      | id2000007  | [30] | AGCAATCCTGAGGGCCAT<br>AAC      | AGCAATCCTGAGGGCC<br>ATAAT      | CGTCTCATGGCAAAG<br>GCTGA                       |

|   |            |            |      |                                       |                                       |                                                                                                                                                                                                                                                                                                     |
|---|------------|------------|------|---------------------------------------|---------------------------------------|-----------------------------------------------------------------------------------------------------------------------------------------------------------------------------------------------------------------------------------------------------------------------------------------------------|
| 2 | 2,406,169  | ad02000512 | [30] | GCTTAGCTAGTACTACAG<br>CTAATTTGACAT    | GCTTAGCTAGTACTACA<br>GCTAATTTGACAC    | TTTGTATTATTAGTTTT<br>TTATTTTGTGAGGAA<br>TGAATGA<br>CTAGAATCATCGTAAT<br>TACTACTCATATATGT<br>CACCATTT<br>CAATGCCCGTGTATTAT<br>TTCACGCCAA<br>GGACTATTAAATAGC<br>CCTCCGAAATCTTA<br>CTCTTTGCCTTCGTGC<br>AACGTCAA<br>CTGAACTGCTCCAGCT<br>CGGAGAT<br>CCAACGTGCAATTTAA<br>CAAACCAAATGCAA<br>CGCTGGTCGCTGCCG |
| 2 | 4,361,466  | id2002293  | [30] | CTGGTGCTGGTTTAAGCA<br>GTAA            | CTGGTGCTGGTTTAAGC<br>AGTAG            |                                                                                                                                                                                                                                                                                                     |
| 2 | 5,523,756  | KJ02_009   | [29] | CACATCGTTCCAATTTCA<br>ACCAAACATTT     | CATCGTTCCAATTTCAA<br>CCAAACATTC       |                                                                                                                                                                                                                                                                                                     |
| 2 | 22,684,234 | KJ02_039   | [29] | ATCGGTAATCTAAGTTTA<br>ATACTCCTAAAC    | TATCGGTAATCTAAGTT<br>TAATACTCCTAAAT   |                                                                                                                                                                                                                                                                                                     |
| 2 | 23,850,625 | KJ02_043   | [29] | GGAGGTAATCCCGTGGC<br>GGA              | GGAGGTAATCCCGTGG<br>CGGT              |                                                                                                                                                                                                                                                                                                     |
| 2 | 24,278,925 | KJ02_045   | [29] | CCCATGGCCAGACGGAG<br>TCA              | CCATGGCCAGACGGAG<br>TCG               |                                                                                                                                                                                                                                                                                                     |
| 2 | 24,582,137 | KJ02_047   | [29] | GCCTTTTAGGAAGAAATT<br>ATAGCTAGTG      | AGCCTTTTAGGAAGAAA<br>TTATAGCTAGTA     |                                                                                                                                                                                                                                                                                                     |
| 2 | 24,835,540 | id2009889  | [30] | GATCGATCACCTCGCTGC<br>T               | ATCGATCACCTCGCTGC<br>C                |                                                                                                                                                                                                                                                                                                     |
| 2 | 26,176,180 | KJ02_053   | [29] | GAAGGGGATATGATTGC<br>ATTCGTCT         | AAGGGGATATGATTGC<br>ATTCGTCC          |                                                                                                                                                                                                                                                                                                     |
| 2 | 26,691,450 | KJ02_057   | [29] | TTCTTGTGTGCTCTTTTC<br>TTCCTTC         | GTTTTCTTGTGTGCTCT<br>TTTCTTCCTTT      |                                                                                                                                                                                                                                                                                                     |
| 2 | 26,817,689 | ad02011845 | [30] | GGCTTAGCTACTTCATCG<br>TTTCTAGT        | GCTTAGCTACTTCATCG<br>TTTCTAGC         |                                                                                                                                                                                                                                                                                                     |
| 2 | 29,130,590 | id2012773  | [30] | CAGACAATCTTCAGGCAA<br>AGCTC           | CAGACAATCTTCAGGCA<br>AAGCTT           |                                                                                                                                                                                                                                                                                                     |
| 2 | 30,450,152 | KJ02_067   | [29] | AAGTTGCTAAAAAATCAT<br>ATTAATCTATTTTAA | AAGTTGCTAAAAAATCA<br>TATTAATCTATTTTTT |                                                                                                                                                                                                                                                                                                     |
| 2 | 30,861,574 | ae02004877 | [30] | GAGTGCTGTCATAATATT<br>GCACTGG         | GAGTGCTGTCATAATAT<br>TGCCTGC          |                                                                                                                                                                                                                                                                                                     |
| 2 | 32,719,981 | cmb0232.7  | [30] | CTTGACCGCAAAACCGGA<br>TAT             | CTTGACCGCAAAACCGG<br>ATAC             |                                                                                                                                                                                                                                                                                                     |
| 2 | 33,610,265 | id2014575  | [30] | AGTAGAAAATGTATTAC<br>AGTTCCAGCT       | AGTAGAAAATGTATTCA<br>CAGTTCCAGCA      |                                                                                                                                                                                                                                                                                                     |
| 2 | 36,626,894 | cmb0236.6  | [30] | GTTACAGCATAAAGGAA<br>AGGAAAACCC       | GTTACAGCATAAAGGA<br>AAGGAAAACCT       |                                                                                                                                                                                                                                                                                                     |



|   |            |            |      |                                     |                                       |                                          |
|---|------------|------------|------|-------------------------------------|---------------------------------------|------------------------------------------|
| 3 | 25,505     | ad03000001 | [30] | TCCACACATGTCTTGTTA<br>AAACCC        | GTCCACACATGTCTTGT<br>TAAAAACCA        | CCTCCTTTTTCTTTCTA<br>TCTGTGAGCATCT       |
| 3 | 1,729,434  | KJ03_007   | [29] | ACCTTCCAACCCTAGCAT<br>GCG           | CACCTTCCAACCCTAGC<br>ATGCA            | GAAACACACCCTTC<br>AATTACTGTGCTTT         |
| 3 | 3,524,497  | ah03000403 | [30] | TTGATCAAAGCACACAGA<br>AAGCG         | CTTGATCAAAGCACACA<br>GAAAGCA          | TGTGGCGTCGATACTT<br>TACAGTTGA            |
| 3 | 5,676,626  | KJ03_017   | [29] | TTTTTTTCTAAAAGAATA<br>ATACAACTCGTGT | CTTTTTTTTCTAAAAGAA<br>TAATACAACTCGTGA | CAATAAGTAAACACA<br>CAAATTTGTAGGATA       |
| 3 | 5,920,066  | id3003462  | [30] | TGCCTTTAATGGAGCATC<br>ATGGA         | GCCTTTAATGGAGCATC<br>ATGGG            | GGATTGCATGACCAT<br>CAAGGCA               |
| 3 | 10,023,081 | id3005168  | [30] | GTTGTTTGACTGTACCCA<br>AATGTACT      | GTTGTTTGACTGTACCC<br>AAATGTACC        | AGCAACATCTATAGTT<br>GTCCAGGGATTTT        |
| 3 | 11,972,407 | KJ03_027   | [29] | ATATCTGTCGGATTTTAA<br>AAAGCCCTA     | ATATCTGTCGGATTTTT<br>AAAAGCCCTC       | GGATAATATCCACTCC<br>ATATTTGTCCGAA        |
| 3 | 12,321,614 | ah03001094 | [30] | GCTCTGCTCTCTGTCTC<br>GA             | CTCTGCTCTCTGTCTC<br>GG                | GGGACACGGACAGAA<br>AGGAAAAAA             |
| 3 | 12,785,160 | KJ03_031   | [29] | CCTGACCAGGGGCGGTCT<br>A             | CTGACCAGGGGCGGTC<br>TG                | ACCACCGTTGTGAGG<br>CCGGTTA               |
| 3 | 13,122,748 | KJ03_033   | [29] | GAAGAAGAGAATTGACC<br>CAGTTTATAAGA   | AGAAGAGAATTGACCC<br>AGTTTATAAGG       | GATGTATGGTTTTCG<br>GGTCCGGTTA            |
| 3 | 15,548,178 | id3007541  | [30] | GATCCGGGTGGTGTCAGT<br>T             | GATCCGGGTGGTGTC<br>GTC                | CAGAGTAATGGGAAG<br>GCATGCA               |
| 3 | 24,305,190 | id3010700  | [30] | GAAGAAGATGCCAAGTTT<br>GCTGTT        | AAGAAGATGCCAAGTTT<br>GCTGTC           | AGGGAAGCTTCAGCC<br>ATCGT                 |
| 3 | 25,848,924 | ad03013905 | [30] | GGAAGGCTCTGTGCTTAC<br>GTTTA         | GAAGGCTCTGTGCTTAC<br>GTTTC            | CCACAAGCCTGAATA<br>CAAGGCA               |
| 3 | 27,135,408 | ad03014175 | [30] | GATGGCGAGTTTGACACA<br>GATCTA        | TGGCGAGTTTGACACAG<br>ATCTG            | TGGGAGGTCGTCGTC<br>GC                    |
| 3 | 32,355,773 | KJ03_069   | [29] | TTTTAACTGTAAACGG<br>TATGTTTTTTGT    | CTTTTTAACTGTAAAA<br>CGGTATGTTTTTGC    | GCAGCGATTAGCGGT<br>TGATTAATTAAGTA        |
| 3 | 32,410,973 | Hd6-AT     | [30] | TGTGGAGGTCCAAACATT<br>GTGT          | TGTGGAGGTCCAAACAT<br>TGTGA            | CTAGGAGTCTTAGAA<br>TGTTGATCTCTGACA       |
| 3 | 32,981,871 | id3015453  | [30] | TTGCCACTGTGTGCAACA<br>TTT           | TTGCCACTGTGTGCAAC<br>ATTC             | CATCGGCAACGAGAC<br>GAAACA                |
| 3 | 35,132,848 | ah03002520 | [30] | CTTACAACACTCTCTCA<br>TGCTCT         | TTACAACACTCTCTCA<br>TGCTCC            | GCCATGCAAAAGATT<br>TTTATATAGATTGTGG<br>C |

|   |            |           |      |                                      |                                      |                                                                                    |
|---|------------|-----------|------|--------------------------------------|--------------------------------------|------------------------------------------------------------------------------------|
| 3 | 36,572,765 | cmb0336.5 | [30] | TCTGAAGATCACGAGAG<br>GAAGGT          | CTGAAGATCACGAGAG<br>GAAGGC           | G TTCACATGGGCCTCC<br>GC                                                            |
| 3 | 37,181,952 | id3018439 | [30] | TCAATCTGCACATACGGG<br>ATAAATGT       | CAATCTGCACATACGGG<br>ATAAATGC        | GGCGATATATTCTCTT<br>CATT CATGCTAAAGTG<br>ACTAGCTAGAAAGAA<br>ATCTCTGACTTTTTGT<br>GT |
| 4 | 2,456,955  | id4001096 | [30] | AGTTAAACAAGTAGTTAC<br>TCTAACCGTTGAA  | AGTTAAACAAGTAGTTA<br>CTCTAACCGTTGAT  | CGGCGATTTCGGTAG<br>GACTGAAATT                                                      |
| 4 | 4,526,234  | KJ04_021  | [29] | GAAATGTGCCGAAAATCA<br>CGAAATTTCA     | AAATGTGCCGAAAATCA<br>CGAAATTTTCG     | GGCCAAATAAGATTG<br>ACCCAAGGCAA                                                     |
| 4 | 6,384,872  | KJ04_029  | [29] | GTATCTGGACAAGTTCTA<br>TAATCGAAAG     | AAGTATCTGGACAAGTT<br>CTATAATCGAAAA   | GATGCTTGAAGAATT<br>TGTTTGTCGGGATT                                                  |
| 4 | 9,051,840  | KJ04_039  | [29] | TTGCATTAGCTTATCTAA<br>GCGATAAAGA     | GCATTAGCTTATCTAAG<br>CGATAAAGC       | TAGGGATACACAAGA<br>CAATTGGGGATAA                                                   |
| 4 | 10,695,483 | KJ04_043  | [29] | GAAGATGTCGATGTTGA<br>GCACAG          | ACGAAGATGTCGATGTT<br>GAGCACAA        | CTAGGGAAAAACCTA<br>CACCGGTGAA                                                      |
| 4 | 11,832,332 | KJ04_047  | [29] | CAACCGCTGCCCCCTATGC<br>C             | GCAACCGCTGCCCCCTAT<br>GCT            | GAGATCTCGTTGATCC<br>CCATCGATT                                                      |
| 4 | 12,548,965 | KJ04_049  | [29] | AGAAGTAGACGAAACTG<br>ACGATTCC        | AAAGAAGTAGACGAAA<br>CTGACGATTCT      | ACCGAGTTCAAGACA<br>TTGAAGTTCTAGTA                                                  |
| 4 | 17,250,626 | KJ04_053  | [29] | TCTTCAATGTCCTCACTAA<br>TTGTCAG       | TTCTTCAATGTCCTCACT<br>AATTGTCAA      | CACAAACGATCTCAA<br>ACTGTTAAGTTCTTT                                                 |
| 4 | 18,114,091 | KJ04_057  | [29] | GAACTATTATAACATGGT<br>TAATTAAGTGTTA  | GAACTATTATAACATGG<br>TTAATTAAGTGTTT  | ACCATTTGACAGTTTG<br>AAAAGGATGGTAATA<br>AAAA                                        |
| 4 | 18,813,976 | cmb0418.8 | [30] | AGGTGGTGTTCTTTTTTA<br>ATTAAGACAGATTC | AGGTGGTGTTCTTTTTT<br>AATTAAGACAGATTT | GTAAAAGCTCAACTG<br>GATGACAGAGAAAA<br>GGACGCTTTATGTAC<br>ACGTTAAGGAAAT              |
| 4 | 19,541,114 | KJ04_059  | [29] | CGGGACATTTTAAGGGAC<br>TCCTG          | CGGGACATTTTAAGGG<br>ACTCCTC          | TTCGCTGTAGGGGTG<br>CGACGAA                                                         |
| 4 | 20,356,970 | KJ04_061  | [29] | CCGTCTGTGGACTCCGTG<br>ATA            | CCGTCTGTGGACTCCGT<br>GATG            | GGAGGTCAGTCAAAT<br>TTCTATAATCTTTAGA<br>AGCA                                        |
| 4 | 20,703,190 | KJ04_063  | [29] | GATTGCATTGTGTCATCA<br>TTGCCAAG       | AGATTGCATTGTGTCAT<br>CATTGCCAAA      | GCAAGTCACCTCTTG<br>TTGTTTTAACGA                                                    |
| 4 | 20,730,844 | cmb0420.7 | [30] | TGGAGTTGAAAGTTGAA<br>ACTCATCAAC      | GTGGAGTTGAAAGTTG<br>AAACTCATCAAT     |                                                                                    |
| 4 | 22,750,935 | cmb0422.7 | [30] | TCAGTGTGGCTGGAAGA<br>AGTC            | CATCAGTGTGGCTGGAA<br>GAAGTA          |                                                                                    |

---

|   |            |            |      |                                       |                                       |                                              |
|---|------------|------------|------|---------------------------------------|---------------------------------------|----------------------------------------------|
| 4 | 24,379,789 | id4007882  | [30] | CATGCGTTGGTCATTGCC<br>TAC             | CATGCGTTGGTCATTGC<br>CTAA             | AGTATGGCAAACCGG<br>GAGCA                     |
| 4 | 26,443,283 | ad04009559 | [30] | GCTGGATCTATAGCCCC<br>C                | TGCTGGATCTATAGCCC<br>CCT              | AAATCCAACACGCCG<br>GAAGC                     |
| 4 | 28,788,134 | ah04001252 | [30] | AAAGCCACCAGCAATTGT<br>CATTT           | AAGCCACCAGCAATTGT<br>CATTC            | ACGTCGGACAACAAA<br>TTGAATGAAAATATG<br>AT     |
| 4 | 30,014,981 | id4009823  | [30] | GCTTGCTGGTTTGTCAAG<br>TGC             | GCTTGCTGGTTTGTCAA<br>GTGT             | AGTTTCTTTATCTTCG<br>CATCGGATGGA              |
| 4 | 32,268,324 | cmb0432.2  | [30] | TCTGTATCTCACTGTAGT<br>CCTGGT          | TCTGTATCTCACTGTAG<br>TCCTGGG          | GGATCTCACAGTAGC<br>CTATCAAATGGA              |
| 4 | 34,108,743 | cmb0434.1  | [30] | CAAAACGGCGGCAGAAT<br>TGT              | AAACGGCGGCAGAATT<br>GC                | GACAAAGCTAGGATT<br>ATTAGATATGATCACC<br>AAGT  |
| 4 | 34,535,832 | KJ04_093   | [29] | CATCTTGGAATTTGCAGG<br>ATGTGGAA        | ATCTTGGAATTTGCAGG<br>ATGTGGAG         | CCACCATCCATCCATT<br>CATTCTGGAA               |
| 4 | 35,843,455 | id4012434  | [30] | TTCAGGTACTGATGCCAA<br>GTACC           | GATTCAGGTACTGATGC<br>CAAGTACT         | TGTGGACTAGCCCTA<br>CGTACTCT                  |
| 5 | 2,831,817  | KJ05_011   | [29] | AAATAGTTTAACTTTAAC<br>TAAAGTTAAATCGTT | AAATAGTTTAACTTTAA<br>CTAAAGTTAAATCGTC | GTCCTTCTGGGGCTG<br>GTAAGAATTA                |
| 5 | 4,734,427  | id5002497  | [30] | TTCCTTTTCACTGCATTAC<br>AAATCAGAC      | CTTCCTTTTCACTGCATT<br>ACAAATCAGAT     | GGAATATCATCATATT<br>ATAGGTTGACTAGCT<br>ACTCC |
| 5 | 4,783,888  | KJ05_013   | [29] | CAAGCCACGGATGGCTG<br>GCAA             | AGCCACGGATGGCTGG<br>CAG               | AGAAAGAAGGGATGA<br>GAGATGCTTTTCAT            |
| 5 | 5,984,919  | KJ05_017   | [29] | CGTCACCATCTCCGCAGG<br>CA              | GTCACCATCTCCGCAGG<br>CG               | GGAGGACGGGGACG<br>GCGAT                      |
| 5 | 6,562,635  | KJ05_019   | [29] | AGCTAATACTTAATTAAT<br>CACACACTAATG    | CTAGCTAATACTTAATT<br>AATCACACACTAATA  | CAGTGAGCACGGAAA<br>ATAGAGCGAT                |
| 5 | 7,392,294  | KJ05_023   | [29] | GCCGAAGCACTCAACCCT<br>CTAT            | GCCGAAGCACTCAACCC<br>TCTAA            | ACCGTATTCAATGGTT<br>TGGGGTGTAATAAT           |
| 5 | 8,028,641  | id5004086  | [30] | ACCAAATATTGTTGTAT<br>AGGAGTAAGAGC     | CACCAAATATTGTTGT<br>ATAGGAGTAAGAGT    | CGGCCAGGGTTCTGT<br>CAAA                      |
| 5 | 11,127,260 | cmb0511.1  | [30] | CGTGCAAGACCATTTGAA<br>GCTC            | CGTGCAAGACCATTTGA<br>AGCTA            | GGGCGCCAACACCAA<br>AACC                      |
| 5 | 12,691,869 | KJ05_029   | [29] | AATACACATACATTCTAG<br>TTATATGATTAACC  | AATACACATACATTCTA<br>GTTATATGATTAACT  | CAGGAAGGCATCGGA<br>TAGAGGATAT                |

|   |            |            |      |                                        |                                        |                                                      |
|---|------------|------------|------|----------------------------------------|----------------------------------------|------------------------------------------------------|
| 5 | 14,387,882 | id5005882  | [30] | GCCTGAAAATGCTTGTTT<br>CTCTGT           | GCCTGAAAATGCTTGTT<br>TCTCTGA           | TGTTCATTAACCGATC<br>GGATTCCGAAT<br>GTACAGCAAACCTCTTC |
| 5 | 22,039,255 | ad05008445 | [30] | CAGCCGTCCAAACGGTTC                     | CAGCCGTCCAAACGGTT<br>T                 | TATATATGATCTGTTC<br>GT                               |
| 5 | 24,121,914 | id5010886  | [30] | GAACTGTCCCTTTCTTGG<br>TCATC            | GGAACGTGCCCTTTCTT<br>GGTCATT           | GACGCGTGCTTGACA<br>GCAT                              |
| 5 | 25,852,536 | KJ05_063   | [29] | AAGGAGTCCATAGGCTG<br>CTGCT             | GGAGTCCATAGGCTGCT<br>GCC               | AAAATGGTATCAAAG<br>TGAACAGGCCCTT                     |
| 5 | 26,029,645 | KJ05_065   | [29] | CCTCTAGCTAATTTATCCT<br>CTCGC           | GCCTCTAGCTAATTTAT<br>CCTCTCGT          | TCACCACCGGTCGCC<br>AGACAAA                           |
| 5 | 26,356,605 | cmb0526.3  | [30] | TGTACGTTGTCCAAATAC<br>ATCTCTAGAAA      | ATGTACGTTGTCCAAAT<br>ACATCTCTAGAAT     | GCATGTCCTGAAGTA<br>CTACTCCTGT                        |
| 5 | 27,795,820 | KJ05_071   | [29] | GCCGATGTAATTTAAGCA<br>ACAAGATCTAT      | CCGATGTAATTTAAGCA<br>ACAAGATCTAC       | CTGGTTTGGGGCAA<br>GTGTTTACTTTATT                     |
| 5 | 28,700,370 | id5014265  | [30] | GCCAACTTTGTCAGAAA<br>CAGGTT            | GCCAACTTTGTCAGAA<br>ACAGGTC            | GCATGATACTTCTATC<br>ATGTACACTCCTGA                   |
| 5 | 29,798,006 | cmb0529.7  | [30] | GGGAGGGAAAGGACTCC<br>C                 | AGGGAGGGAAAGGACT<br>CCA                | AGTATTAACAAACA<br>GAAGAAAGGATAATG<br>ATACTCTGT       |
| 6 | 243,274    | id6000073  | [30] | GCAAGCCGATTGTTACGA<br>ACTT             | GCAAGCCGATTGTTACG<br>AACTC             | GCTTTGCTATGTGGTT<br>GGTGATACA                        |
| 6 | 1,038,324  | KJ06_005   | [29] | GCGTGATTAATTAACAT<br>TAGCTAATTTTTTTA   | GCGTGATTAATTAACAT<br>TTAGCTAATTTTTTTT  | CGGTTAAACGGTGCA<br>TTTTTACAAAAAGTT                   |
| 6 | 2,936,067  | KJ06_009   | [29] | TACAACTTAAAAATAGA<br>TATGTTTCTTTTTA    | ACAACTTAAAAATAGA<br>TATGTTTCTTTTTT     | TCGATCAAACCTGTTAT<br>AAACAACACGCTTT                  |
| 6 | 3,365,147  | KJ06_011   | [29] | TTTCTTTGATAACCATTTA<br>AGTTGCAACTAAA   | CTTTGATAACCATTTAA<br>GTTGCAACTAAC      | GTAGAATATTGGAGT<br>CAGTATCCCTTCAA                    |
| 6 | 5,593,526  | cmb0605.5  | [30] | CCGAATTAGGCATAAATT<br>TGGCACG          | CCGAATTAGGCATAAAT<br>TTGGCACC          | TGCTGCACAGATTGC<br>ACGAC                             |
| 6 | 5,760,512  | S5-TC      | [30] | TGAGGAATAATCGACGAT<br>CAGCAAA          | TGAGGAATAATCGACG<br>ATCAGCAAG          | CCAGGGGAAACAATT<br>CGGCTT                            |
| 6 | 7,077,663  | cmb0607.0  | [30] | CTGATACTAAGGGAAACA<br>AAATGCATGAA      | TGATACTAAGGGAAAC<br>AAAATGCATGAC       | CTCCTGGGCATTGGC<br>ATGAA                             |
| 6 | 7,708,089  | KJ06_027   | [29] | CACATTTCATATTGATATT<br>AATGAGTCTAAATAC | CACATTTCATATTGATAT<br>TAATGAGTCTAAATAG | GTTTAACCTTAATCTT<br>GTCTAAAACGTCAA                   |

|   |            |            |      |                                          |                                              |                                                  |
|---|------------|------------|------|------------------------------------------|----------------------------------------------|--------------------------------------------------|
| 6 | 7,841,654  | cmb0607.8  | [30] | TGAAGCATGGCCTTGAAG<br>ACT                | GAAGCATGGCCTTGAA<br>GACC                     | ACAGTGTGTGGAGAT<br>CAAGGACAT                     |
| 6 | 7,837,648  | KJ06_029   | [29] | CCCTCTTTTCGTAAATATA<br>AGTATTTAAAGC      | CTCCCTCTTTTCGTAAATA<br>TAAGTATTTAAAGT        | TGGGAGGTGAAATGG<br>GAAGAAATTTGTTA                |
| 6 | 8,481,127  | KJ06_031   | [29] | ACTATGATGTCAATATTT<br>AGTATTAGGTAAAT     | ACTATGATGTCAATATT<br>TAGTATTAGGTAAAG         | TATTTGGACTTGCTCC<br>ATCCGTTCTTAAA                |
| 6 | 8,725,792  | id6005608  | [30] | CGTAATAATGATATAATA<br>ACCGCGCTGAATTAC    | CGTAATAATGATATAAT<br>AACCGCGCTGAATTAA        | GCTGTTGTGATGCGT<br>GGGAT                         |
| 6 | 13,653,907 | id6008118  | [30] | AAAAAACCTACCTGATCA<br>GATCCACT           | AAAAACCTACCTGATCA<br>GATCCACA                | GAGATGATATTTTATA<br>GTGTAGTCTTACCATC             |
| 6 | 18,066,599 | id6009699  | [30] | ACAATCCATGGTCGGTTG<br>ATGAA              | ACAATCCATGGTCGGTT<br>GATGAT                  | GCCTGCATGACCATC<br>GGC                           |
| 6 | 18,278,072 | cmb0618.2  | [30] | TCCACACGGACACGGTTT<br>C                  | TCCACACGGACACGGTT<br>TT                      | ACAAAACAATAATGG<br>AATGGATCTGAAAAG               |
| 7 | 122,298    | cmb0700.1  | [30] | ACCTGTACTCCTGTAGGT<br>TTAGGTT            | TACCTGTACTCCTGTAG<br>GTTTAGGTA               | CGTCTTGCCAAGCAA<br>GCCA                          |
| 7 | 2,277,644  | KJ07_011   | [29] | CATTGAAGATTACCAACA<br>AGAATTAAGTAAG      | GCATTGAAGATTACCAA<br>CAAGAATTAAGTAAA         | CATATATTACGACGAC<br>TCTCCTTTTCCTT                |
| 7 | 2,563,993  | ud7000187  | [30] | CAAAATCCCTTATATTATT<br>GCTATTAAACCTTTGAT | CAAAATCCCTTATATTA<br>TTGCTATTAAACCTTTG<br>AC | AATTACATTACTGTAT<br>ATTTTATATTCTATG<br>TTGTCAAA  |
| 7 | 2,749,068  | KJ07_013   | [29] | GTGTATCAACAGATAGAA<br>CTTACTCTCTT        | GTATCAACAGATAGAAC<br>TTACTCTCTC              | AAGGATCAAATTCCTT<br>TCTAGGTAAAGTTT               |
| 7 | 3,292,230  | cmb0703.2  | [30] | GATTCATTTAGCTCAGCT<br>TAGCTGTG           | GATTCATTTAGCTCAGC<br>TTAGCTGTC               | CCCACACTAGCTGACT<br>GTCCT                        |
| 7 | 4,239,741  | KJ07_019   | [29] | TTAATACTTTACATGTGTC<br>CAAACATTTCAAT     | AATACTTTACATGTGTC<br>CAAACATTTCAAC           | ATCGATTTAGGCCAT<br>GTTTCAGTTCTCAAA               |
| 7 | 4,265,929  | ad07001853 | [30] | CCCCAACTATTACAGTT<br>GCTCG               | ACCCCAACTATTACAG<br>TTGCTCA                  | GGGTGTTAAATATCT<br>AGTATTTGAGTTTAAAG<br>GAGGTA   |
| 7 | 4,644,793  | KJ07_021   | [29] | AAAGATCCAACGCACCAA<br>AATTTGACT          | AGATCCAACGCACCAAA<br>ATTTGACC                | CAGCTTTGCTAAAATT<br>ATGTCGGCATCTT                |
| 7 | 7,019,781  | id7001155  | [30] | GCCACACATACACATCAG<br>CATACA             | CCACACATACACATCAG<br>CATACG                  | AAAAATTCAAATAGA<br>AATATATATATCCTGT<br>GAGCAAACA |

---

|   |            |           |      |                                      |                                     |                                                  |
|---|------------|-----------|------|--------------------------------------|-------------------------------------|--------------------------------------------------|
| 7 | 11,030,430 | KJ07_033  | [29] | CCTCAGCGCCTGCAGCCA                   | CCTCAGCGCCTGCAGCC<br>G              | CCCTCTCTCGACGGTG<br>CCATA                        |
| 7 | 11,588,122 | id7001998 | [30] | GGTTGGTTTGGCGATCTC<br>ATCT           | GTTGGTTTGGCGATCTC<br>ATCA           | AGGTGCTCCAGTGCT<br>GTAAGG                        |
| 7 | 15,667,894 | id7002392 | [30] | ACTGATGTGAAGAACAGT<br>CTAGAGC        | CACTGATGTGAAGAACA<br>GTCTAGAGT      | TGCTTCATGCCATCGA<br>TCAGGA                       |
| 7 | 17,762,865 | KJ07_049  | [29] | GTGACCTCTCCAAGGAGA<br>TTA            | CTGTGACCTCTCCAAGG<br>AGATTG         | ACAACTGGCGTCGGG<br>CCTTCTT                       |
| 7 | 18,017,078 | cmb0718.0 | [30] | AATTAATGTTTGTCTCA<br>CCTATTTTCGTTTAG | AATTAATGTTTGTCTC<br>ACCTATTTTCGTTAA | TTTACGTGGTTTTC<br>AAAGAAAATAATAAT<br>AATGAAGGA   |
| 7 | 18,168,615 | KJ07_051  | [29] | TTATAATAATTCGCGTTT<br>ATATACATGCATGT | ATAATAATTCGCGTTTA<br>TATACATGCATGC  | CGCCGCAGGTTAGGT<br>ATATTTTCGTA                   |
| 7 | 20,321,276 | id7003072 | [30] | CGGAATCTCATTTTCTTA<br>AGCTGCATA      | CGGAATCTCATTTTCTT<br>AAGCTGCATT     | GTAAGAAAATATATT<br>GGTCTATTAGCCTATA<br>CAATCCTGT |
| 7 | 22,377,948 | KJ07_067  | [29] | GGTATCAGTTGGTACCGA<br>TTGATCT        | GTATCAGTTGGTACCGA<br>TTGATCG        | GCCAGATCTGGTACTT<br>GTTAGTACCAA                  |
| 7 | 23,014,905 | cmb0723.0 | [30] | TGCTCTTTCTTCTGCTTG<br>ACTTTG         | GTGCTCTTTCTTCTGCTT<br>TGACTTTT      | GCGAATGGACACGGC<br>AGC                           |
| 7 | 23,471,376 | KJ07_069  | [29] | CGGAGGCGTTGTTTCACC<br>ACA            | CGGAGGCGTTGTTTCAC<br>CACG           | GTTTGCCATCGAGCA<br>CCTGGCAT                      |
| 7 | 24,146,716 | KJ07_071  | [29] | GTAGACGATGTTCCCGTT<br>TTCTTC         | CGTAGACGATGTTCCCG<br>TTTTCTTT       | GTTGCCACTCGACTCA<br>TGGGCTA                      |
| 7 | 25,326,292 | SLG7-GC   | [30] | CAAAGCCTTCTCAAGGGA<br>AGAAC          | CAAAGCCTTCTCAAGGG<br>AAGAAG         | GCTTCTTGGACTCTTC<br>GAGACCT                      |
| 7 | 25,682,560 | id7004645 | [30] | ACGTGGCTCAAGCTCACT<br>G              | AACGTGGCTCAAGCTCA<br>CTA            | TGCGCAAATCGCAGT<br>GTGAC                         |
| 7 | 27,003,411 | cmb0727.0 | [30] | ACTGACAAATACCTGCCA<br>CACA           | CTGACAAATACCTGCCA<br>CACG           | TCAAACCTCAAACTTTT<br>ATTTTGAACACTGCT             |
| 7 | 28,576,878 | cmb0728.5 | [30] | CAGATAACAGGGACATA<br>GTGGACATA       | AGATAACAGGGACATA<br>GTGGACATG       | GAGCCGCCTAAGATT<br>TTCCTTTTCG                    |
| 7 | 29,529,536 | KJ07_085  | [29] | CCTCCTGCTGGAGTCTAC<br>AGAT           | CCTCCTGCTGGAGTCTA<br>CAGAA          | CCTGTGTACAATTTGG<br>CATGACAATGAAA                |
| 7 | 29,931,834 | id7006027 | [30] | CATAAATCAGAATTACAG<br>GTTGCAGCT      | CATAAATCAGAATTACA<br>GGTTCAGCA      | AAACCTTGAGGAAT<br>GTCATCGTCT                     |

|   |            |            |      |                                      |                                   |                                            |
|---|------------|------------|------|--------------------------------------|-----------------------------------|--------------------------------------------|
| 7 | 30,325,349 | cmb0730.3  | [30] | GCAGTGGGATGGCAGC                     | TGCAGTGGGATGGCAG<br>T             | CGGCGCTTTGCTGCA<br>GG                      |
| 8 | 2,855,479  | cmb0802.8  | [30] | ATCTCTAGTAAAAGGGTG<br>CCATACG        | GATCTCTAGTAAAAGGG<br>TGCCATACA    | AGCCTATAGCCATAAT<br>GATGTCATTGTGA          |
| 8 | 4,097,511  | KJ08_017   | [29] | TCACAAAATCCCCAAATA<br>CATCAAGC       | CTTTCACAAAATCCCCA<br>AATACATCAAGT | GGTTAGAGTGAATGG<br>GATTTGGAGAAAAT          |
| 8 | 5,648,540  | cmb0805.6  | [30] | CCACAAAGACACTGACAC<br>CAATT          | CCACAAAGACACTGACA<br>CCAATC       | CTGCCCCCGGCCAAT<br>G                       |
| 8 | 5,786,550  | KJ08_023   | [29] | AAATACTACTGTAACGTT<br>AGTACGGAC      | CTAAATACTACTGTAAC<br>GTTAGTACGGAT | CGTACTAGCCAAGTT<br>ATTGTACTAGTGTA          |
| 8 | 6,204,862  | KJ08_025   | [29] | TATTATCTTGGATGGAAA<br>TAAAATATACAGCT | ATCTTGGATGGAAATAA<br>AATATACAGCC  | GTCAATATTTGCAACG<br>AGATAATTCCAGAA         |
| 8 | 8,332,647  | KJ08_035   | [29] | CGCGTGTGTTGCATGGAG<br>ACG            | CGCGTGTGTTGCATGGA<br>GACA         | GCAGAGATCGTATAG<br>GTGTCCTGAT              |
| 8 | 8,424,668  | wd8001250  | [30] | CCAACGGGTCGCTGGTG                    | CCAACGGGTCGCTGGTA                 | ACAGGAGTTCATCAT<br>AGATTTGCCTGT            |
| 8 | 10,499,283 | KJ08_045   | [29] | ATTCTCTAACAACCATAT<br>ACAATGAGTTGT   | CTCTAACAACCATATAC<br>AATGAGTTGC   | ATGGTTCGACTGATA<br>CTCTCCATCATAAA          |
| 8 | 11,622,925 | KJ08_049   | [29] | AGCCGTTGATGTAGTTGA<br>GGGATTA        | CCGTTGATGTAGTTGAG<br>GGATTC       | TCGGCCAGAGGTCGT<br>TGTCTTA                 |
| 8 | 11,798,820 | id8003584  | [30] | TCAAGGTGGTCCTCGACA<br>CTA            | CAAGGTGGTCCTCGACA<br>CTC          | GTATTGCGCTATGCCA<br>CGGT                   |
| 8 | 12,459,153 | KJ08_053   | [29] | ACTCGTTTTCTTCCGCGT<br>GATTAG         | ACTCGTTTTCTTCCGCGT<br>GATTAC      | CACAATGGCATAACGT<br>TGTAAGAAGCAA           |
| 8 | 13,990,791 | KJ08_059   | [29] | GGCGACAACCTAGAGTAG<br>TGACG          | CGGCGACAACCTAGAGT<br>AGTGACA      | CACCATCGCCGCGCC<br>GTCAT                   |
| 8 | 20,253,954 | KJ08_085   | [29] | GCATTGGACTTGCGAGAT<br>TTGTCA         | GCATTGGACTTGCGAGA<br>TTTGTCT      | AGCGGTCGTCGGGTC<br>GGGT                    |
| 8 | 21,503,195 | ae08007378 | [30] | TCTTCCACCAAACCTTGCA<br>TGAATTC       | TCTTCCACCAAACCTTGC<br>ATGAATTT    | AGAAAATACCATCCTC<br>AAGGAGCACA             |
| 8 | 23,740,826 | id8006751  | [30] | CTCATTGGTGATAATGCA<br>CTTGTATGAAT    | TCATTGGTGATAATGCA<br>CTTGTATGAAC  | GCATTCTCACAAAGT<br>GTATATAATGCCAGA<br>TC   |
| 8 | 24,799,130 | cmb0824.7  | [30] | CTCAAGGCCGTACATCCA<br>TATGTA         | TCAAGGCCGTACATCCA<br>TATGTG       | CCTTCTCTAATATTCA<br>CGTCTTTTAGATTAC<br>GCT |

|   |            |            |      |                                     |                                     |                                                  |
|---|------------|------------|------|-------------------------------------|-------------------------------------|--------------------------------------------------|
| 8 | 26,590,280 | GW8-AG     | [30] | ATCTAAAGGCGAGCAAA<br>GAGGT          | CTAAAGGCGAGCAAAG<br>AGGC            | TCCTTTAGCTCGGCAA<br>CTCGT                        |
| 8 | 27,921,569 | id8007764  | [30] | TCGTTACAGCATGTCAGT<br>AGCC          | CTCGTTACAGCATGTCA<br>GTAGCA         | GTGCACTTCGTTCCAA<br>GGCT                         |
| 9 | 438,538    | id9000045  | [30] | CAAGGCAAGTACACTTTT<br>CTCCAAT       | CAAGGCAAGTACACTTT<br>TCTCCAAC       | GACCACATGTAATCTT<br>AGTTTACATGATAAA<br>ATCGG     |
| 9 | 4,288,667  | id9000884  | [30] | TGCTCCTCAATACATTTG<br>ATAACAGCT     | GCTCCTCAATACATTTG<br>ATAACAGCC      | GAACGCGAGTTGTCT<br>GCCTT                         |
| 9 | 7,214,648  | cmb0907.2  | [30] | TGAGCCCCGAGCTTGACAT<br>AA           | TGAGCCCCGAGCTTGACA<br>TAC           | GCTGAGGCTCAAAGC<br>TAGGGT                        |
| 9 | 8,073,443  | KJ09_027   | [29] | AAATTAAGAAAGGCT<br>GATGGGAGTTTAA    | AAAAGAAAGGCTGATG<br>GGAGTTTAG       | AGCCTTTAGCCACTAG<br>TCTAGCTTTATAT                |
| 9 | 8,513,936  | id9002419  | [30] | TGCATTGCTCCGATTGAT<br>AGGAG         | GCATTGCTCCGATTGAT<br>AGGAC          | TCTATTCTGGACTACA<br>GTCCGAACATATCA               |
| 9 | 8,744,926  | KJ09_029   | [29] | CTGACACCGGACTTGAAA<br>GCC           | CTCTGACACCGGACTTG<br>AAAGCT         | CGAAATCACCGACGC<br>TTCTGCAAT                     |
| 9 | 9,607,302  | cmb0909.6  | [30] | ATGGATCAACAAAATTGT<br>GCTCCTATTT    | GATGGATCAACAAAATT<br>GTGCTCCTATTA   | CAAAGTGAGCAAGGG<br>TCAGCA                        |
| 9 | 11,439,570 | KJ09_039   | [29] | TATAAAGTTGAAGTGTAT<br>ACAGTTTGGC    | CTTATAAAGTTGAAGTG<br>TATACAGTTTGGT  | CGAGTGTCTGTAGC<br>AAATTTTGCCTAAA                 |
| 9 | 11,776,387 | KJ09_041   | [29] | ATGTGCCCAACATTTTAG<br>CCTACG        | AATATGTGCCCAACATT<br>TTAGCCTACA     | CCTAACTCTTTTTTGG<br>TTTCAGCCATCAT                |
| 9 | 12,505,826 | id9003183  | [30] | AAGATGGTGAAAGCCAC<br>CTGA           | AGATGGTGAAAGCCAC<br>CTGG            | AGGGCAACCAAAAGC<br>ATTGGTC                       |
| 9 | 14,468,502 | cmb0914.4  | [30] | GCCCAAGCACACTCACTA<br>ATTTTTTA      | GCCCAAGCACACTCACT<br>AATTTTTT       | TACTAGTATTAACCTA<br>TAGGGGATTAGTGTA<br>GATCATTTT |
| 9 | 15,394,586 | id9004072  | [30] | ACCACATGACCTGATCTT<br>TGCA          | CCACATGACCTGATCTT<br>TGCG           | CAGCTAGAAGAATTT<br>TTGATGCAACTCCA                |
| 9 | 17,509,141 | ae09005437 | [30] | CTACTCCTACGTGTTCTGT<br>TCCAAT       | ACTCCTACGTGTTCTGT<br>TCCAAC         | GCTCTCTGAAATAGTA<br>TACGTGTAAAGCTTA<br>GT        |
| 9 | 18,502,078 | KJ09_067   | [29] | CGAAACGACAGTCAAATA<br>TAAATATCCATTT | CGAAACGACAGTCAAAT<br>ATAAATATCCATTA | ATAGGGCGACTTCCC<br>ATGCAATTTTATAT                |
| 9 | 19,337,813 | KJ09_071   | [29] | GATAGGAAGAAGAATCA<br>TGGAGAGG       | GATAGGAAGAAGAATC<br>ATGGAGAGA       | CATAGTACCTCGTCG<br>GCAGTATACAA                   |



|    |            |            |      |                                       |                                      |                                              |
|----|------------|------------|------|---------------------------------------|--------------------------------------|----------------------------------------------|
| 9  | 20,044,954 | id9006953  | [30] | ATAGAAGTTCTGAATCTG<br>CTAACACTGA      | GAAGTTCTGAATCTGCT<br>AACACTGC        | TTGAAATCGCCGGTT<br>ACCGC                     |
| 9  | 20,091,056 | KJ09_073   | [29] | GATGGCACGTCAAGTTTT<br>ACAAAAGTTT      | ATGGCACGTCAAGTTTT<br>ACAAAAGTTC      | GAGAATCCTTCTTCGC<br>GTTGAATTTCAAT            |
| 9  | 20,497,375 | KJ09_075   | [29] | CACGTACGAAGTATGTAT<br>GTACATGATA      | ACGTACGAAGTATGTAT<br>GTACATGATC      | CCCACGTCACCCGTAC<br>GTGTA                    |
| 9  | 21,615,845 | TAC1-CT    | [30] | AGAAATTCCCTTTACCTT<br>TTGCG           | AAGAAATTCCCTTTAC<br>CTTTTGCA         | AGCGTGAGGATGGAT<br>CCAACA                    |
| 9  | 22,166,657 | KJ09_081   | [29] | GACACTTGTAACCTTGTTG<br>CACATGTATA     | ACACTTGTAACCTTGTTG<br>CACATGTATG     | GGCGCTGAATAAACT<br>CATTCACATGTAAA            |
| 9  | 22,403,093 | KJ09_083   | [29] | CTATTGCTATTTCCAAGA<br>CCG             | GGCTCTATTGCTATTTT<br>CAAGACCA        | TCTGAGAATGCTCGA<br>CAGAAACAAAGTTT            |
| 9  | 23,484,844 | id9007784  | [30] | GAACAAGTCGCTGCATTT<br>GGTATTA         | ACAAGTCGCTGCATTTG<br>GTATTG          | GCGTCACCATTGGCC<br>CT                        |
| 10 | 973,578    | KJ10_003   | [29] | GAAAATCGGCTAAAAGG<br>CTGAAGG          | GGAAAATCGGCTAAAA<br>GGCTGAAGA        | GTAATTTTGCTGCCAG<br>GGATAAGGATTTT            |
| 10 | 1,796,849  | KJ10_005   | [29] | GAGAAAGTACATTAAATA<br>AGGGTGTGATTT    | AGAAAGTACATTAAATA<br>AGGGTGTGATTC    | ATTACCTCTAATTAA<br>CCTCTCTCTCACTT            |
| 10 | 2,760,140  | KJ10_009   | [29] | GATTTCGGTCCCTCCCTTCT<br>TCT           | CGGTCCCTCCCTTCTTCC                   | CATAAATTTAGGAAA<br>GTAATACGGTGCCAA           |
| 10 | 6,305,120  | id10002069 | [30] | AAACCATAAAGCTGCTTG<br>ACAGATTAAAT     | AACCATAAAGCTGCTTG<br>ACAGATTAAAG     | GGTTACCTTACATTCA<br>TGCAACATGGAA             |
| 10 | 10,730,617 | id10002842 | [30] | GAATGAGTCAGTCAGGC<br>AGTGTA           | TGAGTCAGTCAGGCAGT<br>GTG             | GCAAACATAAACTAAA<br>AAATATGTCTGACAG<br>TCTCA |
| 10 | 15,128,495 | KJ10_019   | [29] | GTAACCTCTCCAGTCGTT<br>ATAGAATACAT     | AACTTCTCCAGTCGTTA<br>TAGAATACAG      | CATGTTAGAGGGTAA<br>AAACTTAATCGGCAT           |
| 10 | 16,412,329 | cmb1016.4  | [30] | AACTGCAATTCTAGGAGT<br>GGCT            | AACTGCAATTCTAGGAG<br>TGGCA           | CGAGGCTATGTTATG<br>TTCTATGTTTCACT            |
| 10 | 19,917,460 | wd10003790 | [30] | TCTAGGTGCAAATGGTGT<br>TGTC            | CTAGGTGCAAATGGTGT<br>TGTC            | GGAAGCATGGCACTC<br>TTGAAAGT                  |
| 10 | 20,358,666 | KJ10_039   | [29] | AGAGCTCGGCTGCTCGA<br>GA               | AGAGCTCGGCTGCTCGA<br>GC              | GCCTGCCTCCATTCTT<br>TTACTTCGAA               |
| 10 | 21,047,555 | KJ10_041   | [29] | ACACTAATAATTAGATAC<br>TTTGTAGGGTAAAAT | CACTAATAATTAGATAC<br>TTTGTAGGGTAAAAG | GAAACATGTATAGTTT<br>CTTGTTGCACCAAA           |
| 10 | 21,389,928 | KJ10_043   | [29] | ATCTCACTCTACACTTTGT<br>AGGCTG         | CATCTCACTCTACACTTT<br>GTAGGCTA       | GCTGGAACAAAGAAT<br>CGAGTGTGTATATA            |

|    |            |            |      |                                         |                                         |                                                  |
|----|------------|------------|------|-----------------------------------------|-----------------------------------------|--------------------------------------------------|
| 10 | 21,598,545 | ah10001182 | [30] | CGAAAGAGAGGGGACTAC<br>TATTTATTTATGATGTC | CGAAAGAGAGGGGACTA<br>CTATTTATTTATGATGTA | TGGACGGAGCTAGCA<br>TTGTCAT                       |
| 10 | 21,823,138 | KJ10_045   | [29] | GGAAGCTCCTCGCTCCGG                      | GGAAGCTCCTCGCTCC<br>GA                  | CTCTTTTCCACCGCCA<br>CCAAGCTT                     |
| 10 | 22,128,982 | KJ10_047   | [29] | GCCAGAAAGGAACCGAG<br>AATTGC             | GCCAGAAAGGAACCGA<br>GAATTGT             | ATTGTTCCAGCTTATT<br>TCTCGCCCTTTT                 |
| 10 | 22,459,939 | KJ10_049   | [29] | ACTAAATGGATGCACATA<br>TTTAATAACTTTAAA   | ACTAAATGGATGCACAT<br>ATTTAATAACTTTAAG   | GTTGTTCCGGATTGATA<br>TCATTTCAAACCAT              |
| 10 | 23,690,908 | id10007384 | [30] | CTTCTCAAATCGCTCAAA<br>TGATCCT           | CTTCTCAAATCGCTCAA<br>ATGATCCA           | TCCATGGCCAAGATG<br>GGGT                          |
| 11 | 680,665    | id11000131 | [30] | ATTTGATAAAATCGTCAT<br>CCAAACCGT         | TTGATAAAATCGTCATC<br>CAAACCGC           | GGCCAACACAAGATC<br>CCCAG                         |
| 11 | 2,455,283  | KJ11_005   | [29] | GAGAATTTGATGAGTTTA<br>ATTGCTGTTAGAA     | GAGAATTTGATGAGTTT<br>AATTGCTGTTAGAT     | AATCCAAGTAGTATC<br>ACAGTTTGGGGAAA                |
| 11 | 2,669,824  | cmb1102.6  | [30] | TGAGGGCAATGCATTTGT<br>GATACTA           | AGGGCAATGCATTTGTG<br>ATACTG             | CCATCAATAATGCATG<br>GAGTCATGATGAG                |
| 11 | 4,667,865  | cmb1104.6  | [30] | GTTGCGTGAAGACCTCAG<br>AAATTTA           | TTGCGTGAAGACCTCAG<br>AAATTTG            | GTTGTTTTCTTCCCGG<br>TATAAATCACTGT                |
| 11 | 5,007,156  | KJ11_013   | [29] | TACATAAAAGTGCAATGT<br>GAAAACCCTA        | ACATAAAAGTGCAATGT<br>GAAAACCCTG         | GAGTGAAAATGACTT<br>ACATAGGATATGTTA               |
| 11 | 5,628,396  | id11002336 | [30] | GTAATCGACAATAATCTC<br>AAGTTGCCG         | GTAATCGACAATAATCT<br>CAAGTTGCCA         | GACTGTTCAACTTCAG<br>CAGGCA                       |
| 11 | 7,109,268  | cmb1107.1  | [30] | AATTTAGATTTTCATCCAG<br>AATTGAGTTGCA     | AAATTTAGATTTTCATCC<br>AGAATTGAGTTGCT    | CTGGATTGATTGATAT<br>ATAGATATGTTTGATT<br>GCTTATTA |
| 11 | 9,670,517  | wd11000649 | [30] | CAATTTTCTGTGAGTCTTT<br>GCGGA            | AATTTTCTGTGAGTCTTT<br>GCGGG             | AAGCCTGAGGGTGCG<br>TACA                          |
| 11 | 9,835,830  | cmb1109.8  | [30] | TTGGATTTTGTCAAAGAC<br>AAATGGTCA         | TGGATTTTGTCAAAGAC<br>AAATGGTCG          | ACGAGTCCATCAAAG<br>ATGAGTGAGG                    |
| 11 | 10,335,474 | KJ11_033   | [29] | GAAATTAATGATGTACTT<br>GTTCCGTTTTTCAAT   | AATTAATGATGTACTTG<br>TTCCGTTTTTCATG     | CAAGGGACGTTATAA<br>TCACATGACCAAAA                |
| 11 | 21,212,729 | id11006897 | [30] | TTTCTGAGTCTTGCCCTGT<br>GT               | TCTGAGTCTTGCCCTGT<br>GC                 | GATCCTTGTGCTCTCC<br>AGCCT                        |
| 11 | 21,935,946 | cmb1121.9  | [30] | AATGACAATTAAGCACAA<br>ACCTGAAAGATA      | TGACAATTAAGCACAAA<br>CCTGAAAGATG        | GAGGCTGCCACTTGC<br>ACA                           |
| 11 | 25,372,661 | id11008929 | [30] | TGCAGTAGAAAGATACAC<br>CGCC              | ATGCAGTAGAAAGATA<br>CACCGCA             | GATCAGATGTGGAGT<br>TTTTGTCACTTCAA                |

|    |            |            |      |                                       |                                       |                                          |
|----|------------|------------|------|---------------------------------------|---------------------------------------|------------------------------------------|
| 11 | 27,413,918 | cmb1127.4  | [30] | GCTGGCATCCGACGAAG<br>G                | GCTGGCATCCGACGAA<br>GA                | AGTGTTCGTTGTGC<br>TGCC                   |
| 11 | 27,579,717 | KJ11_099   | [29] | AAAAAGAAAAATCATGG<br>GGAAATGATAAGC    | AAAAAGAAAAATCATG<br>GGGAAATGATAAGT    | CTGTCTCTCATATGT<br>TTCCTCTTTCAAT         |
| 11 | 27,843,952 | KJ11_101   | [29] | CACCTCGCCAGCAGCTTC<br>G               | CCACCTCGCCAGCAGCT<br>TCA              | GCGACGACCGGGAGG<br>ACGAA                 |
| 11 | 31,063,738 | id11011607 | [30] | TTGGCCCATCGCAGAAGA<br>T               | TGGCCCATCGCAGAAG<br>AC                | TGACCTCTGGAGTTTC<br>AGTGCTC              |
| 12 | 264,373    | id12000076 | [30] | CTCGTCACAGCATTAGCA<br>TATACTCT        | TCGTCACAGCATTAGCA<br>TATACTCC         | AGGCTATGCGCCTAT<br>GCCA                  |
| 12 | 2,420,416  | cmb1202.4  | [30] | CGTACCATCATTATTGA<br>TTCATGCG         | CGTACCATCATTATTG<br>ATTCATGCA         | TGGACAATGGTGACC<br>CGATGT                |
| 12 | 3,791,039  | KJ12_007   | [29] | TGCAGACTGACAGGGGC<br>AAC              | GCAGACTGACAGGGGC<br>AAG               | CGTACACAAGTACAC<br>ACAACGGCTT            |
| 12 | 4,662,617  | id12002113 | [30] | ACACACCATGCTCTAATG<br>GCTC            | ACACACCATGCTCTAAT<br>GGCTT            | AGGATCGTGGCTCAG<br>CATGT                 |
| 12 | 6,810,046  | KJ12_017   | [29] | CGCGTGCGCACGACA                       | CTCGCGTGGCGCACGAC<br>G                | GTGAGGGTGCAGCAT<br>CGGCTT                |
| 12 | 9,135,012  | id12003700 | [30] | AGAGCTTCTTGGCTCCAA<br>GAAT            | AGAGCTTCTTGGCTCCA<br>AGAAC            | GGCCAGAGCTACCTG<br>ACCT                  |
| 12 | 10,955,863 | KJ12_027   | [29] | AATGAAGAGATAAATTAA<br>ATGTTTAATTGAAAC | AATGAAGAGATAAATTA<br>AATGTTTAATTGAAAT | CACATGCAGCCAATG<br>ACTATTTAGATGAT        |
| 12 | 14,646,923 | id12005212 | [30] | GGAGTTGTGGGCTTAACT<br>TTTCTC          | GGAGTTGTGGGCTTAAC<br>TTTTCTT          | CCGGCCTCAAGATGC<br>TCCA                  |
| 12 | 15,328,542 | KJ12_041   | [29] | TACAGATTTTCATCCGCAA<br>GCGCAT         | CAGATTTTCATCCGCAAG<br>CGCAC           | CTCTCGGGGTGAAAT<br>ATTACAATGGTATA        |
| 12 | 15,839,951 | KJ12_043   | [29] | GGAAGCTAAAAATCACTA<br>GCCAACC         | AGGAAGCTAAAAATCA<br>CTAGCCAAC         | AGGTGGAATGTGTAT<br>GAGGCCCAT             |
| 12 | 18,468,907 | id12006155 | [30] | GCATCGACAGAGATCCG<br>AAATGAC          | GCATCGACAGAGATCC<br>GAAATGAT          | GCGACAGATGAAATA<br>CTGGACAAGC            |
| 12 | 23,255,904 | KJ12_059   | [29] | CAGATGCTCCCAGAATTT<br>TGATCCAA        | CAGATGCTCCCAGAATT<br>TTGATCCAT        | ATGGCGATGGTTTTTT<br>GGAACGTAGTTTT        |
| 12 | 24,056,822 | cmb1224.0  | [30] | GGAATTTCTTGTGCTCAT<br>CGCT            | GGAATTTCTTGTGCTCA<br>TCGCC            | TGGCAGAATCGTAAT<br>AATCTATTTAACGAG<br>GG |
| 12 | 26,032,801 | cmb1226.0  | [30] | CAGCAACTTGAGGGAAG<br>CG               | TCAGCAACTTGAGGGA<br>AGCA              | CTCCTTTTCCACCTCT<br>AACTAGACGG           |

12

27,582,487

id12010130

[30]

GGGGCCACTTGTTTTCAA  
TCA

GGGGCCACTTGTTTTCA  
ATCC

GGGAAGTGTTCCCTC  
CAGGT

---

**Table S3.** Information on the physical distance between SNP markers.

| Chr.  | Number of Markers | Number of Deviated Markers | Average Physical Distance |
|-------|-------------------|----------------------------|---------------------------|
| 1     | 31                | 4                          | 1,441,042                 |
| 2     | 17                | 7                          | 2,154,523                 |
| 3     | 19                | 11                         | 1,956,945                 |
| 4     | 20                | 6                          | 1,792,173                 |
| 5     | 17                | 11                         | 1,752,824                 |
| 6     | 15                | 0                          | 1,218,538                 |
| 7     | 26                | 8                          | 1,166,360                 |
| 8     | 17                | 7                          | 1,642,445                 |
| 9     | 21                | 2                          | 1,118,326                 |
| 10    | 16                | 4                          | 1,480,682                 |
| 11    | 17                | 0                          | 1,827,279                 |
| 12    | 14                | 9                          | 1,970,178                 |
| Total | 230               | 69                         | 1,526,957                 |

**Table S4.** Distribution of flowering time of DH population according to the genotype of *qFG3*.

|                                                                | Cultivation seasons |                 |                 |                 |
|----------------------------------------------------------------|---------------------|-----------------|-----------------|-----------------|
|                                                                | Early 2018          | Normal 2019     | Normal 2021     | Late 2018       |
| <b>93-11</b>                                                   | Sep. 9              | Sep. 6          | Aug. 10         | Oct. 1          |
| <b>Milyang352</b>                                              | Aug. 21             | Aug. 26         | Jul. 31         | Sep. 19         |
| <b>DH population with 93-11<br/>allele of <i>qFG3</i></b>      | Aug. 22–Sep. 13     | Aug. 25–Sep. 15 | Aug. 02–Aug. 24 | Sep. 22–Oct. 20 |
| <b>DH population with<br/>Milyang352 allele of <i>qFG3</i></b> | Aug. 18–Sep. 2      | Aug. 20–Sep. 8  | Jul. 29–Aug. 11 | Sep. 15–Sep. 30 |

**Table S5.** List of candidate genes.

| <b>QTL</b>           | <b>locus name</b> | <b>description</b>                                                                 | <b><i>Biological process/ Molecular function</i></b> |
|----------------------|-------------------|------------------------------------------------------------------------------------|------------------------------------------------------|
| <b><i>qFG3</i></b>   | LOC_Os03g46190    | parafibromin, putative, expressed                                                  | flower development                                   |
|                      | LOC_Os03g46200    | acetyltransferase, GNAT family, putative, expressed                                | transferase activity                                 |
|                      | LOC_Os03g46250    | acetyltransferase, GNAT family, putative, expressed                                | transferase activity                                 |
|                      | LOC_Os03g46325    | pattern formation protein, putative, expressed                                     | post-embryonic development, transporter activity     |
|                      | LOC_Os03g46400    | UDP-glucuronosyl and UDP-glucosyl transferase domain containing protein, expressed | transferase activity, metabolic process              |
|                      | LOC_Os03g46910    | pyruvate kinase, putative, expressed                                               | lipid metabolic process                              |
|                      | LOC_Os03g47070    | RXW8, putative, expressed                                                          | lipid metabolic process                              |
|                      | LOC_Os03g47530    | glycosyl transferase 8 domain containing protein, putative, expressed              | reproduction                                         |
|                      | LOC_Os03g47770    | ubiquitin-conjugating enzyme E2 W, putative, expressed                             | flower development                                   |
| <b><i>qFG5-1</i></b> | LOC_Os05g08850    | Cytochrome P450, putative, expressed                                               | catalytic activity                                   |
|                      | LOC_Os05g08920    | late embryogenesis abundant protein, putative, expressed                           | molecular_function                                   |
|                      | LOC_Os05g08930    | chloroplast lumen common family protein, putative, expressed                       | biological_process                                   |
|                      | LOC_Os05g08950    | phosphoribosyl transferase, putative, expressed                                    | post-embryonic development                           |
|                      | LOC_Os05g08960    | ubiquitin-conjugating enzyme, putative, expressed                                  | reproduction                                         |
|                      | LOC_Os05g08970    | SSRP1-like FACT complex subunit, putative, expressed                               | reproduction                                         |
|                      | LOC_Os05g08990    | glutaminyI-tRNA synthetase, putative, expressed                                    | flower development                                   |
|                      | LOC_Os05g09020    | WRKY67, expressed                                                                  | response to stress                                   |
|                      | LOC_Os05g09370    | kinase, pfkB family, putative, expressed                                           | carbohydrate metabolic process                       |
|                      | LOC_Os05g10730    | ABC transporter, ATP-binding protein, putative, expressed                          | transport                                            |
|                      | LOC_Os05g10810    | O-acyltransferase, putative, expressed                                             | reproduction                                         |
|                      | LOC_Os05g10940    | metal cation transporter, putative, expressed                                      | transport                                            |

|               |                |                                                                          |                                                         |
|---------------|----------------|--------------------------------------------------------------------------|---------------------------------------------------------|
|               | LOC_Os05g11130 | cytochrome P450, putative, expressed                                     | flower development                                      |
|               | LOC_Os05g11360 | DTDP-D-glucose 4,6-dehydratase, putative, expressed                      | transport, catalytic activity                           |
|               | LOC_Os05g11380 | OsMADS66 - MADS-box family gene with MIKCC type-box, expressed           | flower development                                      |
|               | LOC_Os05g11414 | OsMADS58 - MADS-box family gene with MIKCC type-box, expressed           | flower development                                      |
|               | LOC_Os05g11510 | B-box zinc finger family protein, putative, expressed                    | secondary metabolic process, post-embryonic development |
| <i>qFG5-2</i> | LOC_Os05g44910 | dual specificity protein phosphatase, putative, expressed                | carbohydrate metabolic process                          |
|               | LOC_Os05g44922 | 6-phosphofructokinase, putative, expressed                               | carbohydrate metabolic process                          |
|               | LOC_Os05g45080 | anthocyanidin 5,3-O-glucosyltransferase, putative, expressed             | transferase activity                                    |
|               | LOC_Os05g45090 | anthocyanidin 5,3-O-glucosyltransferase, putative, expressed             | transferase activity                                    |
|               | LOC_Os05g45100 | anthocyanidin 5,3-O-glucosyltransferase, putative, expressed             | transferase activity                                    |
|               | LOC_Os05g45110 | anthocyanidin 5,3-O-glucosyltransferase, putative, expressed             | transferase activity                                    |
|               | LOC_Os05g45120 | anthocyanidin 5,3-O-glucosyltransferase, putative, expressed             | transferase activity                                    |
|               | LOC_Os05g45140 | glucosyl transferase, putative, expressed                                | transferase activity                                    |
|               | LOC_Os05g45150 | anthocyanidin 5,3-O-glucosyltransferase, putative, expressed             | transferase activity                                    |
|               | LOC_Os05g45170 | glucosyl transferase, putative, expressed                                | transferase activity                                    |
|               | LOC_Os05g45180 | anthocyanidin 5,3-O-glucosyltransferase, putative, expressed             | transferase activity                                    |
|               | LOC_Os05g45200 | anthocyanidin 5,3-O-glucosyltransferase, putative, expressed             | transferase activity                                    |
|               | LOC_Os05g45230 | WRKY58, expressed                                                        | biosynthetic process                                    |
|               | LOC_Os05g45730 | ubiquinone oxidoreductase, putative, expressed                           | generation of precursor metabolites and energy          |
|               | LOC_Os05g45740 | mitochondrial ATP synthase g subunit family protein, putative, expressed | transport                                               |
|               | LOC_Os05g45760 | EMB1796, putative, expressed                                             | embryo development                                      |
|               | LOC_Os05g45860 | glucan endo-1,3-beta-glucosidase precursor, putative, expressed          | carbohydrate metabolic process                          |



|                |                                                                                                      |                                                  |
|----------------|------------------------------------------------------------------------------------------------------|--------------------------------------------------|
| LOC_Os05g45950 | outer mitochondrial membrane porin, putative, expressed                                              | transport, post-embryonic development            |
| LOC_Os05g45954 | AP2 domain containing protein, expressed                                                             | carbohydrate metabolic process                   |
| LOC_Os05g46020 | WRKY7, expressed                                                                                     | response to stress                               |
| LOC_Os05g46030 | myosin head family protein, expressed                                                                | post-embryonic development, cell differentiation |
| LOC_Os05g46200 | beta-galactosidase 8 precursor, putative, expressed                                                  | carbohydrate metabolic process                   |
| LOC_Os05g46220 | mitochondrial carrier protein, putative, expressed                                                   | flower development                               |
| LOC_Os05g46480 | late embryogenesis abundant protein, group 3, putative, expressed                                    | embryo development                               |
| LOC_Os05g46510 | polygalacturonase, putative, expressed                                                               | carbohydrate metabolic process                   |
| LOC_Os05g46520 | polygalacturonase, putative, expressed                                                               | carbohydrate metabolic process                   |
| LOC_Os05g47560 | serine/threonine-protein kinase SNT7, chloroplast precursor, putative, expressed                     | photosynthesis                                   |
| LOC_Os05g47640 | threonine synthase, chloroplast precursor, putative, expressed                                       | biosynthetic process                             |
| LOC_Os05g47650 | B3 DNA binding domain containing protein, expressed                                                  | embryo development                               |
| LOC_Os05g47780 | E3 ubiquitin ligase, putative, expressed                                                             | embryo development                               |
| LOC_Os05g47850 | chloroplastic group IIA intron splicing facilitator CRS1, chloroplast precursor, putative, expressed | embryo development                               |
| LOC_Os05g47980 | ATP synthase, putative, expressed                                                                    | transport                                        |
| LOC_Os05g48200 | glutamate synthase, chloroplast precursor, putative, expressed                                       | biosynthetic process                             |
| LOC_Os05g48240 | dynamamin family protein, putative, expressed                                                        | embryo development                               |
| LOC_Os05g48410 | 50S ribosomal protein L21, chloroplast precursor, putative, expressed                                | reproduction                                     |

**Table S6.** Putative candidate genes located within *qFG3*.

| No. | MSU ID         | Description                                                                                                      | Biological process                                                                         | Molecular function                                                        | Cellular component                             | Similar papers |
|-----|----------------|------------------------------------------------------------------------------------------------------------------|--------------------------------------------------------------------------------------------|---------------------------------------------------------------------------|------------------------------------------------|----------------|
| 1   | LOC_Os03g44420 | Tubulin/FtsZ domain containing protein, putative, expressed; Similar to Plastid division protein ftsZ1 precursor | Chloroplast fission; cell division; protein polymerization; obsolete GTP catabolic process | GTPase activity; identical protein binding; GTP binding                   | Protein complex; chloroplast stroma; cytoplasm | [33,34]        |
| 2   | LOC_Os03g44440 | Cyclic nucleotide-gated ion channel                                                                              | Potassium ion transport; transmembrane transport                                           | Voltage-gated potassium channel activity; ion channel activity            | Integral component of membrane                 | -              |
| 3   | LOC_Os03g44484 | DNA-directed RNA polymerase II subunit RPB2, beta subunit, protrusion domain containing                          | Reproduction; embryo development; post-embryonic development; transcription                | Transferase activity; DNA-directed 5'-3' RNA polymerase activity          | Cytosol;                                       | -              |
| 4   | LOC_Os03g44500 | Serine/threonine protein phosphatase                                                                             | Metabolic process                                                                          | Binding; hydrolase activity                                               | Cytosol; plasma membrane                       | -              |
| 5   | LOC_Os03g44540 | Nuclear transcription factor Y (Nf-Y-A) subunit                                                                  | Regulation of transcription, DNA-templated                                                 | Sequence-specific DNA binding transcription factor activity               | Nucleus; nucleoplasm                           | -              |
| 6   | LOC_Os03g44580 | Protein of unknown function DUF266, plant family protein                                                         | -                                                                                          | Acetylglucosaminyltransferase activity                                    | Membrane                                       | [51, 52]       |
| 7   | LOC_Os03g44610 | IQ calmodulin-binding motif domain containing protein                                                            | -                                                                                          | Protein binding                                                           | Plasma membrane                                | [53-55]        |
| 8   | LOC_Os03g44620 | Chaperone protein DnaJ                                                                                           | Flower development; response to abiotic stimulus; protein folding                          | Unfolded protein binding; nucleotide binding; heat shock protein binding; | cell wall; nucleolus; cytosol                  | [33,34]        |
| 9   | LOC_Os03g44630 | Plastocyanin-like domain containing protein, putative, expressed; Cupredoxin domain containing protein           | Transport; response to biotic stimulus; response to abiotic stimulus;                      | Copper ion binding; electron transfer activity                            | Membrane; plasma membrane; vacuole             | -              |

|    |                |                                                                                                                                                                     |                                                                                           |                                                                                                                     |                                |         |
|----|----------------|---------------------------------------------------------------------------------------------------------------------------------------------------------------------|-------------------------------------------------------------------------------------------|---------------------------------------------------------------------------------------------------------------------|--------------------------------|---------|
| 10 | LOC_Os03g44636 | Zinc finger, C3HC4 type domain containing protein                                                                                                                   | -                                                                                         | Zinc ion binding; protein binding                                                                                   | Cell                           | -       |
| 11 | LOC_Os03g44660 | Cytosolic 5-nucleotidase III, putative, expressed; Similar to Pyrimidine 5'-nucleotidase family protein, expressed; HAD-superfamily subfamily IE hydrolase protein. | Cellular process                                                                          | Magnesium ion binding; hydrolase activity; 5'-nucleotidase activity                                                 | Cytosol; cytoplasm             |         |
| 12 | LOC_Os03g44710 | OsSh1, YABBY domain containing protein, Similar to Yabby9 protein                                                                                                   | Cell differentiation                                                                      | Sequence-specific DNA binding transcription factor activity; metal ion binding                                      | Nucleus                        | [35-37] |
| 13 | LOC_Os03g44740 | Cytochrome P450 family protein, putative, expressed                                                                                                                 | Oxidation-reduction process; Secondary metabolic process; response to endogenous stimulus | Heme binding; oxidoreductase activity, acting on paired donors, with incorporation or reduction of molecular oxygen | -                              | [38-44] |
| 14 | LOC_Os03g44760 | SWI1, Similar to ameiotic 1, putative, expressed                                                                                                                    | DNA metabolic process; cell cycle; cellular component organization                        | Hydrolase activity                                                                                                  | Nucleus                        | -       |
| 15 | LOC_Os03g44780 | Translation elongation factor EFG/EF2, C-terminal domain containing protein. Tu family protein, putative, expressed                                                 | Translational elongation; catabolic process; obsolete GTP catabolic process               | Translation elongation factor activity, GTPase activity; nucleic acid binding; GTP binding                          | Cytosol                        | -       |
| 16 | LOC_Os03g44820 | Glutamyl-tRNA <sup>Gln</sup> amidotransferase, C subunit family protein, putative, expressed                                                                        | Translation; regulation of translational fidelity                                         | Ligase activity; nucleotide binding; ATP binding                                                                    | Plastid                        | [45]    |
| 17 | LOC_Os03g44830 | OsRhmbd9, Peptidase S54, rhomboid domain containing protein, Putative Rhomboid homologue, expressed                                                                 | -                                                                                         | Serine-type endopeptidase activity                                                                                  | Integral component of membrane | [56]    |
| 18 | LOC_Os03g44890 | Anthranilate phosphoribosyltransferase, C2                                                                                                                          | -                                                                                         | Transferase activity, transferring glycosyl groups; protein binding                                                 | -                              | [57]    |

|    |                |                                                                                                                                                                                 |                                                                                                                                                       |                                                                                                              |                                                                 |         |
|----|----------------|---------------------------------------------------------------------------------------------------------------------------------------------------------------------------------|-------------------------------------------------------------------------------------------------------------------------------------------------------|--------------------------------------------------------------------------------------------------------------|-----------------------------------------------------------------|---------|
| 19 | LOC_Os03g44900 | domain containing protein, putative, expressed<br>CCR4-NOT transcription factor, NOT complex component, N-terminal domain containing protein, putative, expressed               | Regulation of transcription, DNA-templated                                                                                                            | Sequence-specific transcription factor activity                                                              | Nucleus                                                         | [46]    |
| 20 | LOC_Os03g44950 | LTPL91 - Protease inhibitor/seed storage/LTP family protein precursor, expressed                                                                                                | -                                                                                                                                                     | -                                                                                                            | -                                                               | [58,59] |
| 21 | LOC_Os03g45194 | Oxidoreductase, short chain dehydrogenase/reductase family domain containing protein, Similar to Myb-like DNA-binding domain, SHAQKYF class family protein, expressed expressed | Chlorophyll catabolic process; PSII associated light-harvesting complex II catabolic process; oxidation-reduction process; protein metabolic process; | Chlorophyll(ide) b reductase activity; oxidoreductase activity; protein binding                              | Plastid; thylakoid; chloroplast thylakoid membrane; chloroplast | [47-49] |
| 22 | LOC_Os03g45260 | Vesicle transport v-SNARE protein, Similar to Membrin 11 (AtMEMB11) (Golgi SNAP receptor complex member 2-1) (27 kDa Golgi SNARE protein); putative, expressed                  | Cellular component organization; protein transport                                                                                                    | Protein binding                                                                                              | Golgi apparatus; Golgi membrane; Golgi stack                    | -       |
| 23 | LOC_Os03g45320 | OsIPMDH, dehydrogenase, Similar to 3-isopropylmalate dehydrogenase 2; putative, expressed                                                                                       | Leucine biosynthetic process; oxidation-reduction process                                                                                             | Oxidoreductase activity, acting on the CH-OH group of donors, NAD or NADP as acceptor; magnesium ion binding | Plastid; cytoplasm                                              | [50]    |
| 24 | LOC_Os03g45370 | Sodium/calcium exchanger protein, Similar to K-exchanger-like protein, putative, expressed                                                                                      | Transmembrane transport                                                                                                                               | Transporter activity                                                                                         | Cell; integral component of membrane                            | -       |

|    |                |                                                                                |                                                                                                                                                                 |                                                                                                                                                      |                                           |         |
|----|----------------|--------------------------------------------------------------------------------|-----------------------------------------------------------------------------------------------------------------------------------------------------------------|------------------------------------------------------------------------------------------------------------------------------------------------------|-------------------------------------------|---------|
| 25 | LOC_Os03g45390 | Glucan endo-1,3-beta-glucosidase precursor, putative, expressed                | Carbohydrate metabolic process                                                                                                                                  | Hydrolase activity, acting on glycosyl bonds;hydrolyzing O-glycosyl compounds                                                                        | Anchored component of plasma membrane     | -       |
| 26 | LOC_Os03g45400 | Antitermination NusB/RsmB/TIM44 domain containing protein, putative, expressed | Positive regulation of transcription, DNA-templated transcription, termination; aromatic amino acid family biosynthetic process; stomatal complex morphogenesis | RNA binding                                                                                                                                          | Plastid; chloroplast                      | -       |
| 27 | LOC_Os03g45420 | Armadillo/beta-catenin repeat family protein, putative, expressed              | Regulation of chlorophyll biosynthetic process; regulation of abscisic acid biosynthetic process; protein ubiquitination; leaf senescence                       | Ubiquitin-protein transferase activity; protein binding; catalytic activity                                                                          | Plasma membrane; ubiquitin ligase complex | -       |
| 28 | LOC_Os03g45450 | WRKY60, expressed                                                              | Regulation of transcription, DNA-templated                                                                                                                      | Sequence-specific DNA binding transcription factor activity                                                                                          | -                                         | -       |
| 29 | LOC_Os03g45619 | Cytochrome P450 family protein, putative, expressed                            | Oxidation-reduction process                                                                                                                                     | Oxidoreductase activity, acting on paired donors, with incorporation or reduction of molecular oxygen; electron transfer activity; metal ion binding | -                                         | -       |
| 30 | LOC_Os03g45920 | Ankyrin repeat domain-containing protein 50, putative, expressed               | -                                                                                                                                                               | -                                                                                                                                                    | Cell wall                                 | [60,61] |
